# Supplementary material for: A strategy for the synthesis of VN@C and VC@C core–shell composites with hierarchically porous structures and large specific surface areas for high performance symmetric supercapacitors
Source: Royal Society of Chemistry journal article supplement (doi:10.1039/c8dt01194j), 2018-01-01
Supplement: c8dt01194j1.pdf [file c8dt01194j1.pdf]

## Electronic supplementary information

### Synthesis of vanadium oxide hydrate $\text{H}_2\text{V}_3\text{O}_8$ nanobelts

Vanadium pentoxide ( $\text{V}_2\text{O}_5$ ), ethanol, and Glucose ( $\text{C}_6\text{H}_{12}\text{O}_6 \cdot \text{H}_2\text{O}$ ) with analytical grade were purchased from Sinopharm Chemical Reagent Co., Ltd and used without any further purification. The synthesis of vanadium oxide hydrate  $\text{H}_2\text{V}_3\text{O}_8$  nanobelts was based on our previous report [1]. In a typical synthesis, 1.82 g of  $\text{V}_2\text{O}_5$  powder was dispersed into 5 mL of ethanol, and then 75 mL of deionized water was added into the above solution with magnetic stirring. The mixed solution was transferred into a 100 mL Teflon Lined stainless steel autoclave after the solution became suspension. The autoclave was sealed and maintained at 180 °C for 48 h and then cooled to room temperature naturally. The products were filtered off, washed with distilled water and absolute ethanol several times to remove any possible residue, and dried in vacuum at 75 °C for future application.

### Synthesis of $\text{H}_2\text{V}_3\text{O}_8@\text{C}$ core-shell composites

The synthesis of  $\text{H}_2\text{V}_3\text{O}_8@\text{C}$  core-shell composite was according to our previous reports [2, 3]. In a typical procedure, 0.5 g of the as-obtained  $\text{H}_2\text{V}_3\text{O}_8$  nanobelts were dispersed into the glucose solution (3.0 g of glucose and 60 mL of distilled water) in a 100 mL beaker under ultrasonic for 20 min, and then the mixture was stirred vigorously for 1 h by magnetic stirrer. After the solution became suspension, they were transferred into a 100 mL Teflon Lined stainless steel autoclave, which was sealed and maintained at 180 °C for 4 h. After cooling to room temperature naturally, the products were filtered off, washed with distilled water and absolute ethanol several times, and dried in vacuum at 75 °C for further characterization and application.

Figure S1

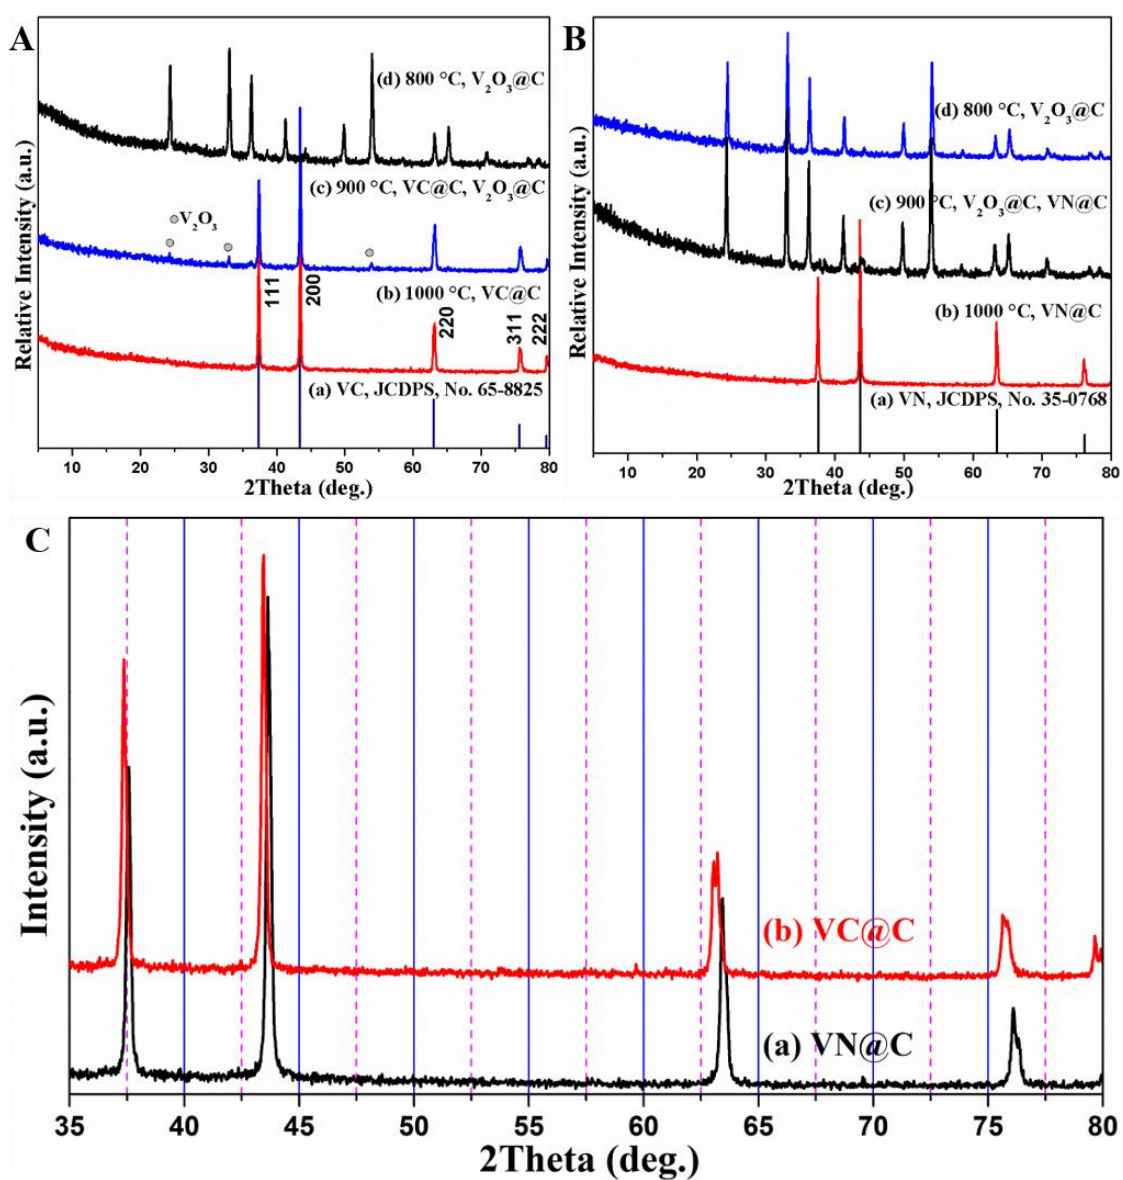

Figure S1. XRD patterns of the samples obtained at various calcined temperatures for 2 h: (A) VC@C series; (B) VN@C series; (C) Identification of the differences of VC@C and VN@C.

Figure S2

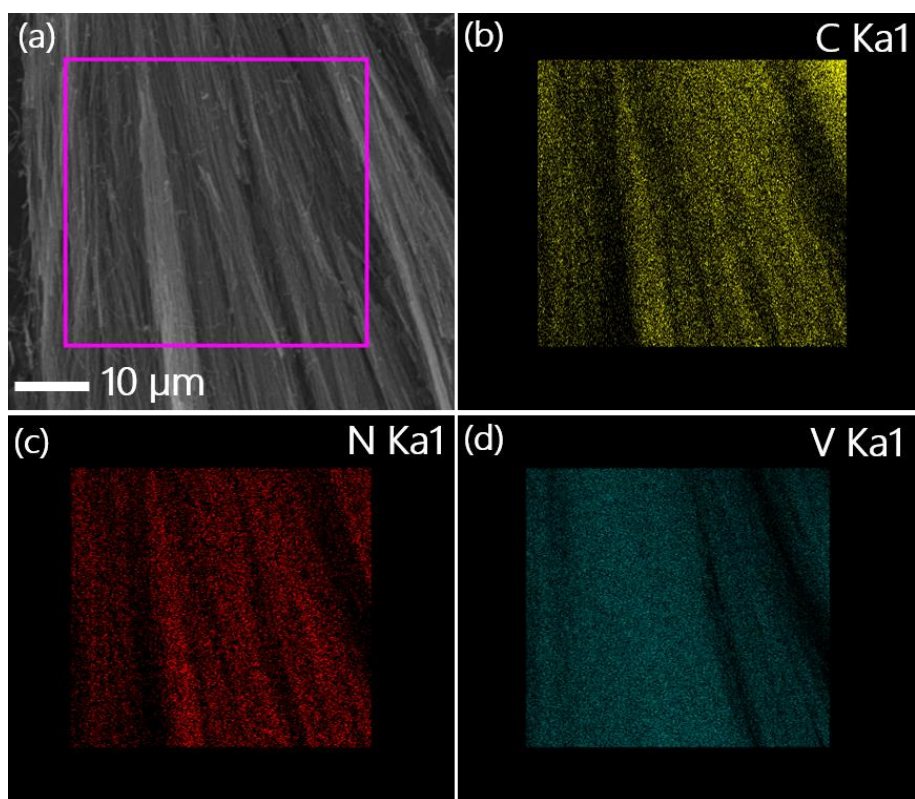

Figure S2. SEM image of VN@C and the corresponding elemental mapping images.

Figure S3

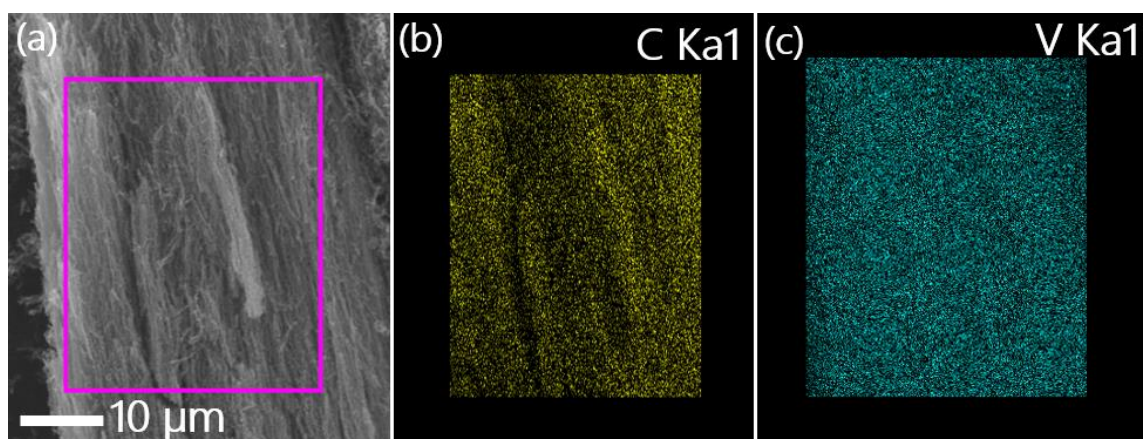

Figure S3. SEM image of VC@C and the corresponding elemental mapping images.

Figure S4

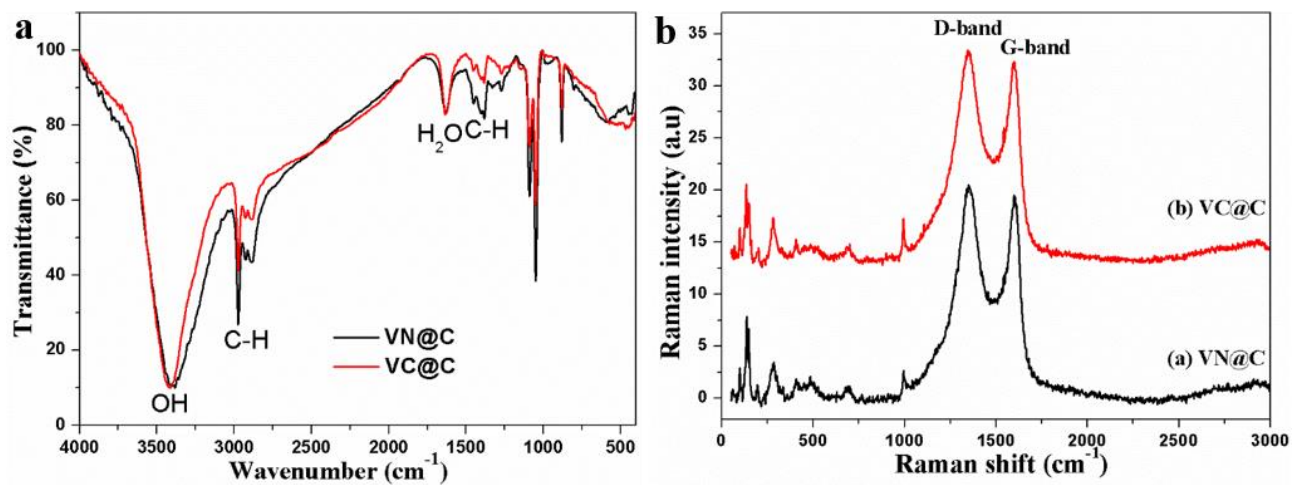

Figure S4. FTIR (a) and Raman (b) spectra of VN@C and VC@C.

Figure S5

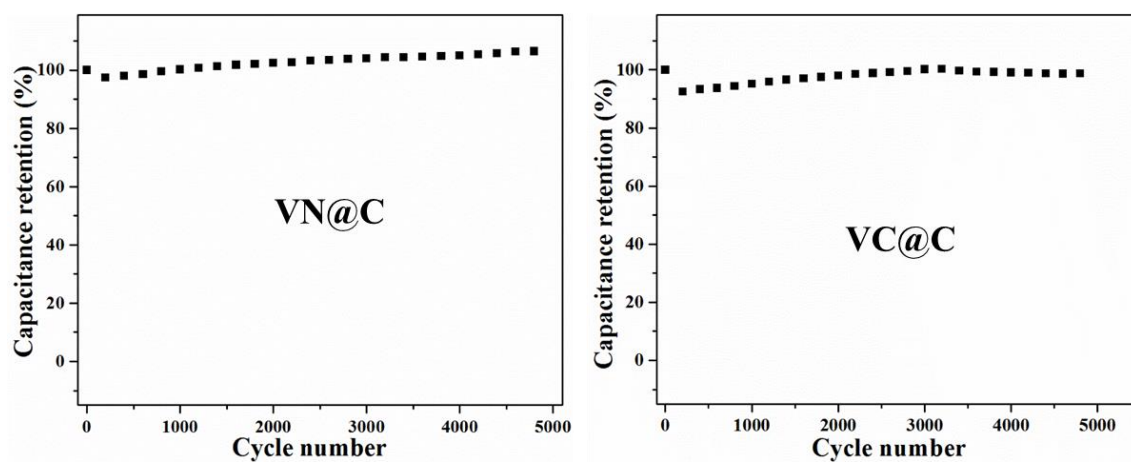

Figure S5. The cycling stability of the as-fabricated VC@C and VN@C SSC electrodes.

Figure S6

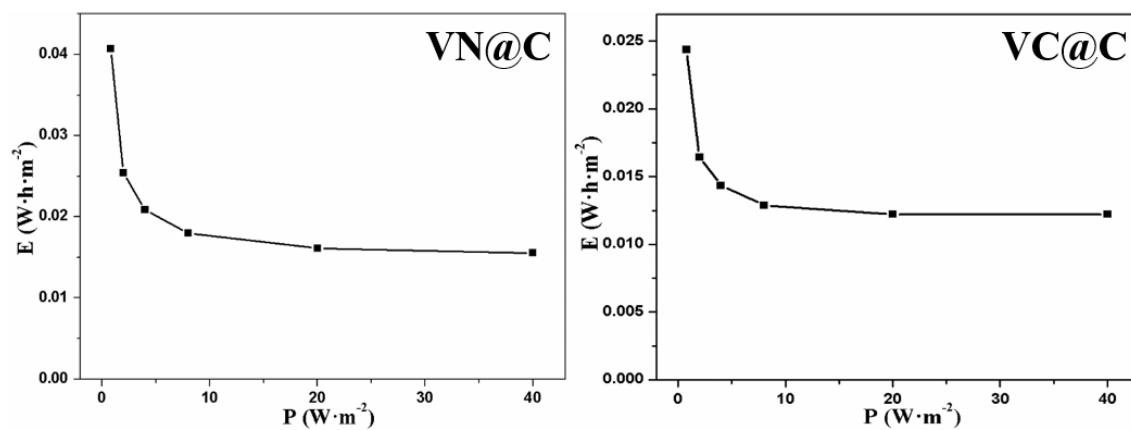

Figure S6. Ragone plots of VN@C SSC device and VC@C SSC device.

**Table S1****Table S1.** Comparison of the electrochemical performance of various materials based on SC devices.

| Various device                                                 | Electrolyte                         | Potential/V | Capacitance<br>/mF·cm <sup>-2</sup> | Energy density                           | Power density                           | Cycling<br>capability | Reference |
|----------------------------------------------------------------|-------------------------------------|-------------|-------------------------------------|------------------------------------------|-----------------------------------------|-----------------------|-----------|
| RGO/Cellulose SSC                                              | H <sub>2</sub> SO <sub>4</sub> /PVA | 0~0.8       | 46, 2 mV·s <sup>-1</sup>            | 15 μWh cm <sup>-2</sup>                  | –                                       | 99 % after<br>5000    | [4]       |
| Activated carbon cloth<br>SSC                                  | H <sub>2</sub> SO <sub>4</sub> /PVA | 0~1         | 31, 10 mV·s <sup>-1</sup>           | –                                        | –                                       | 95 % after<br>20000   | [5]       |
| Graphene-cellulose<br>tissue composites SSC                    | H <sub>2</sub> SO <sub>4</sub> /PVA | 0~1.1       | 80                                  | 9 μWh cm <sup>-2</sup>                   | 100 mW cm <sup>-2</sup>                 | 90 % after<br>5000    | [6]       |
| Hierarchical carbon<br>tubular nanostructures<br>SSC           | H <sub>3</sub> PO <sub>4</sub> /PVA | 0~1         | 80, 5 mV·s <sup>-1</sup>            | –                                        | –                                       | –                     | [7]       |
| Hierarchical carbon<br>tubular nanostructures<br>SSC           | KOH/PVA                             | 0~1         | 79, 5 mV·s <sup>-1</sup>            | –                                        | –                                       | –                     | [7]       |
| Graphite<br>nanosheets/PANI SSC                                | H <sub>2</sub> SO <sub>4</sub> /PVA | 0~0.8       | 77.8, 0.1 mA cm <sup>-2</sup>       | –                                        | –                                       | 83 % after<br>10000   | [8]       |
| PET/Pt/MnO <sub>2</sub> SSC                                    | H <sub>3</sub> PO <sub>4</sub> /PVA | 0~0.8       | 20, 10 mV·s <sup>-2</sup>           | 1.9*10 <sup>-6</sup> Wh cm <sup>-2</sup> | 1.6*10 <sup>-4</sup> W cm <sup>-2</sup> | 82.2 %<br>after 10000 | [9]       |
| V <sub>2</sub> O <sub>5</sub> H <sub>2</sub> O/graphene<br>SSC | LiCl/PVA                            | -0.8~0.8    | 12, 0.25 A·m <sup>-2</sup>          | 1.14 μW h cm <sup>-2</sup>               | 10.0 μW cm <sup>-2</sup>                | 95 % after<br>2000    | [10]      |
| VO <sub>2</sub> NF@3DG SSC                                     | K <sub>2</sub> SO <sub>4</sub>      | -0.6~0.6    | 70.8, 0.5 mA·cm <sup>-2</sup>       | 279.6 mWh m <sup>-2</sup>                | 6000 mW m <sup>-2</sup>                 | 64 % after<br>3000    | [11]      |
| VC@C SSC device                                                | LiCl/PVA                            | 0~0.8       | 46, 5 mV·s <sup>-1</sup>            | 0.024 Wh m <sup>-2</sup>                 | 0.8 W m <sup>-2</sup>                   | 81 % after<br>2000    | This work |
| VN@C SSC device                                                | LiCl/PVA                            | 0~0.8       | 65, 5 mV·s <sup>-1</sup>            | 0.041 Wh m <sup>-2</sup>                 | 0.8 W m <sup>-2</sup>                   | 85 % after<br>2000    | This work |

ASC = Asymmetric Supercapacitors; SSC = Symmetric Supercapacitors; M = mol L<sup>-1</sup>; PVA = Polyvinyl Alcohol

## References

- [1] Y. Zhang, X. Liu, G. Xie, L. Yu, S. Yi, M. Hu, C. Huang, Hydrothermal synthesis, characterization, formation mechanism and electrochemical property of  $V_3O_7 \cdot H_2O$  single-crystal nanobelts, *Mater. Sci. Eng. B*, 175 (2010) 164-171.
- [2] Y. Zhang, X. Liu, D. Chen, L. Yu, J. Nie, S. Yi, H. Li, C. Huang, Fabrication of  $V_3O_7 \cdot H_2O@C$  core-shell nanostructured composites and the effect of  $V_3O_7 \cdot H_2O$  and  $V_3O_7 \cdot H_2O@C$  on decomposition of ammonium perchlorate, *J. Alloys Compd.*, 509 (2011) L69-L73.
- [3] Y. Zhang, M. Zhou, M. Fan, C. Huang, C. Chen, Y. Cao, H. Li, X. Liu, Improvement of the electrochemical properties of  $V_3O_7 \cdot H_2O$  nanobelts for Li battery application through synthesis of  $V_3O_7@C$  core-shell nanostructured composites, *Curr. Appl. Phys.*, 11 (2011) 1159-1163.
- [4] Z. Weng, Y. Su, D.-W. Wang, F. Li, J. Du, H.-M. Cheng, Graphene–Cellulose Paper Flexible Supercapacitors, *Advanced Energy Materials*, 1 (2011) 917-922.
- [5] G. Wang, H. Wang, X. Lu, Y. Ling, M. Yu, T. Zhai, Y. Tong, Y. Li, Solid-State Supercapacitor Based on Activated Carbon Cloths Exhibits Excellent Rate Capability, *Advanced Materials*, 26 (2014) 2676-2682.
- [6] M. Sevilla, G.A. Ferrero, A.B. Fuertes, Graphene-cellulose tissue composites for high power supercapacitors, *Energy Storage Materials*, 5 (2016) 33-42.
- [7] H. Zhang, H. Su, L. Zhang, B. Zhang, F. Chun, X. Chu, W. He, W. Yang, Flexible supercapacitors with high areal capacitance based on hierarchical carbon tubular nanostructures, *Journal of Power Sources*, 331 (2016) 332-339.
- [8] B. Yao, L. Yuan, X. Xiao, J. Zhang, Y. Qi, J. Zhou, J. Zhou, B. Hu, W. Chen, Paper-based solid-state supercapacitors with pencil-drawing graphite/polyaniline networks hybrid electrodes, *Nano Energy*, 2 (2013) 1071-1078.
- [9] X. Long, Z. Zeng, E. Guo, X. Shi, H. Zhou, X. Wang, Facile fabrication of all-solid-state flexible interdigitated  $MnO_2$  supercapacitor via in-situ catalytic solution route, *J. Power Sources*, 325 (2016) 264-272.
- [10] J. Bao, X. Zhang, L. Bai, W. Bai, M. Zhou, J. Xie, M. Guan, J. Zhou, Y. Xie, All-solid-state flexible thin-film supercapacitors with high electrochemical performance based on a two-dimensional  $V_2O_5 \cdot H_2O$ /graphene composite, *J. Mater. Chem. A*, 2 (2014) 10876-10881.
- [11] J. Wang, X. Zhang, Y. Zhang, A. Abas, X. Zhao, Z. Yang, Q. Su, W. Lan, E. Xie, Lightweight, interconnected  $VO_2$  nanoflowers hydrothermally grown on 3D graphene networks for wide-voltage-window supercapacitors, *RSC Adv.*, 7 (2017) 35558-35564.
